# Supplementary material for: Prevalence and associated risk factors of avian influenza A virus subtypes H5N1 and H9N2 in LBMs of East Java province, Indonesia: a cross-sectional study
Source: PeerJ journal article supplement (doi:10.7717/peerj.14095), 2022-10-12
Supplement: Questionaire.docx [file Questionaire.docx]

| 1 | Qualification | Illiterate 1 Middle 2 | Higher secondary 3 | Graduate 4 |
| --- | --- | --- | --- | --- |
| 2 | Occupation | Unemployed 1 | Farm worker 2 | LBM worker 3 |
| 3 | Type of poultry in the flock | Backyard 1 | Broiler 2 | 3Layer |
| 4 | LBM trading category | Wholesale 1 | Retail 2 | Combination3 |
| 5 | Chicken population in LBM | Low 1 | Medium 2 | High 3 |
| 6 | Days operational per week | 1-3 days 1 | 4-5 days 2 | 6-7 days 3 |
| 7 | Are you keeping birds outside cages? | Yes 1 | Not Sure 2 | No 3 |
| 8 | Are you having chicken breeds other than broiler in the cages? | Yes | Not Sure | No |
| 9 | Are you see rodents in the stall? | Yes | Not Sure | No |
| 10 | Are you mix the birds from different sources? | Yes | Not Sure | No |
| 11 | Are you share the equipment used for slaughtering, feeding, watering, and weighing the birds? | Yes | Not Sure | No |
| 12 | Are you mix the poultry arriving on different days in the same cages? | Yes | Not Sure | No |
| 13 | Inspection team from authorities come to visit LBM. | Yes | Not Sure | No |
| 14 | Are you use of detergent during cleaning the wooden tables? | Yes | Not Sure | No |
| 15 | Mixing of different species in same cage. | Yes | Not Sure | No |
| 16 | Are you disinfect the vehicle during deliveries from different areas? | Yes | Not Sure | No |
| 17 | Are wild birds present around stall? | Yes | Not Sure | No |
| 18 | Presence of sick birds in stall? | Yes | Not Sure | No |
| 19 | Are you dispose the dead birds? | Yes | Not Sure | No |
| 20 | Stray dogs accessing the stall. | Yes | Not Sure | No |
| 21 | Presence of ducks in the stall. | Yes | Not Sure | No |
| 22 | Presence of guinea fowl in the stall. | Yes | Not Sure | No |
| 23 | Presence of turkey in the stall. | Yes | Not Sure | No |
| 24 | Presence of pheasants in the stall. | Yes | Not Sure | No |
| 25 | Presence of quails in the stall. | Yes | Not Sure | No |
| 26 | Presence of chukars/partridges in the stall. | Yes | Not Sure | No |
| 27 | Presence of pea fowl, in the stall. | Yes | Not Sure | No |
| 28 | Presence of pet birds, in the stall. | Yes | Not Sure | No |
| 29 | Stray cats in the stall. | Yes | Not Sure | No |
| 30 | Market vehicle picks up birds from farm. | Yes | Not Sure | No |
