# Supplementary material for: Prevalence and associated risk factors of avian influenza A virus subtypes H5N1 and H9N2 in LBMs of East Java province, Indonesia: a cross-sectional study
Source: PeerJ journal article supplement (doi:10.7717/peerj.14095), 2022-10-12
Supplement: updated-heatmap.pdf [file updated-heatmap.pdf]

**Name of variable**

- Type of poultry in the flock
- Live bird markets trading category
- Chicken population in LBMs
- Keeping birds outside cages
- Chicken breeds other than 2 in the cages
- Sight of rodents in the stall
- Mix birds from different sources
- Shared slaughtering, feeding, watering, and weighing equipment
- Arrival of mix poultry on different days in same cages
- Visits of LBMs by the govt Inspection authorities
- Use of detergent for cleaning the wooden tables
- Mixing of different species in same cage
- Disinfection of the vehicle during deliveries from different areas
- Presence of wild birds around stalls
- Presence of sick birds in stalls
- Dispose the dead birds
- Access of stray dogs to the stalls
- Presence of ducks in the stalls
- Presence of Guinea fowl in the stalls
- Presence of Turkey in the stalls
- Presence of Pheasants in the stalls
- Presence of Quails in the stalls
- Presence of Chukars/partridges in the stalls
- Presence of Pea fowl in the stalls
- Presence of Pet birds in the stalls
- Presence of Stray cats in the stalls

**H5N1 H9N2**

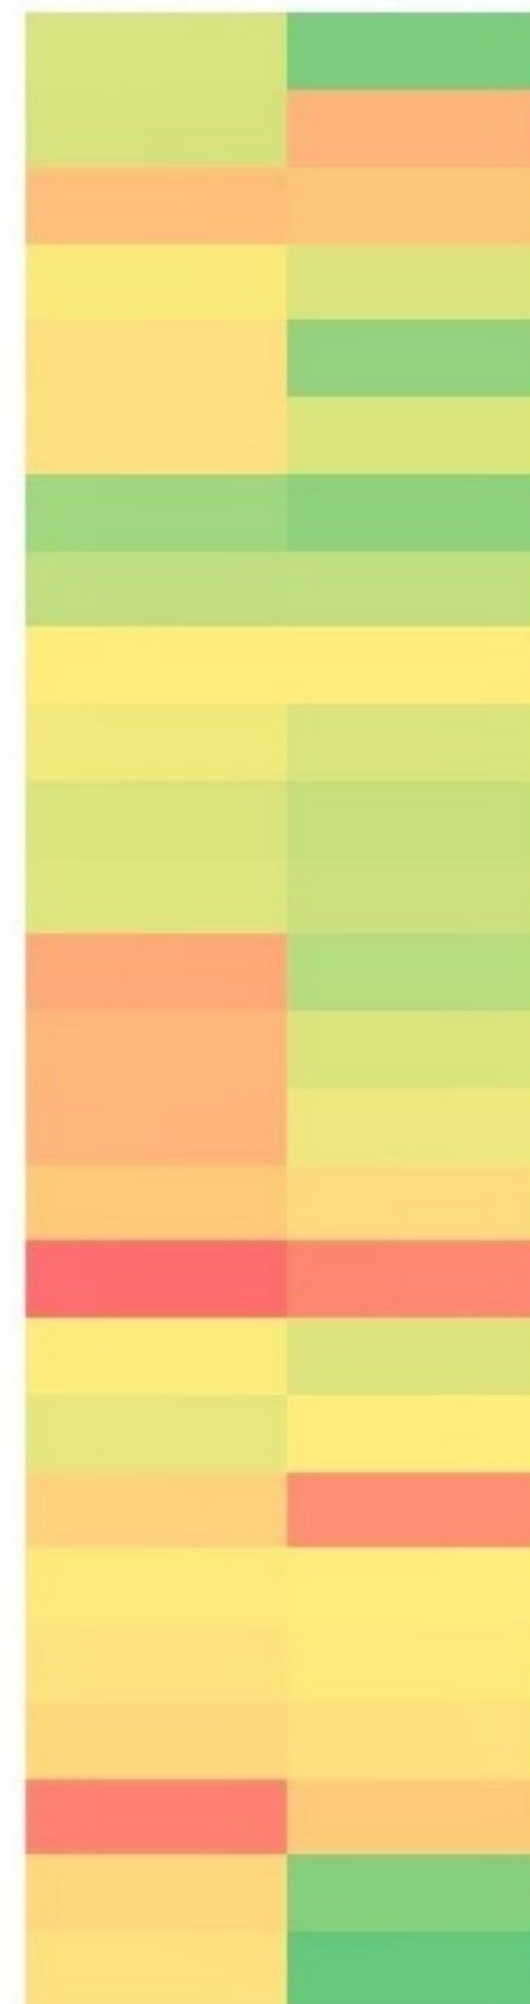

| Correlation scale | Relationship   |
|-------------------|----------------|
| 1                 | A perfect +ev  |
| 0.7               | Strong +ev     |
| 0.5               | Moderate +ev   |
| 0.3               | A weak +ev     |
| -1                | A perfect -ev  |
| -0.7              | Strong -ev     |
| -0.5              | A moderate -ev |
| -0.3              | A weak -ev     |
| 0                 | No correlation |
